# Supplementary material
Source: PubMed Central journal article supplement (PMC6217972)

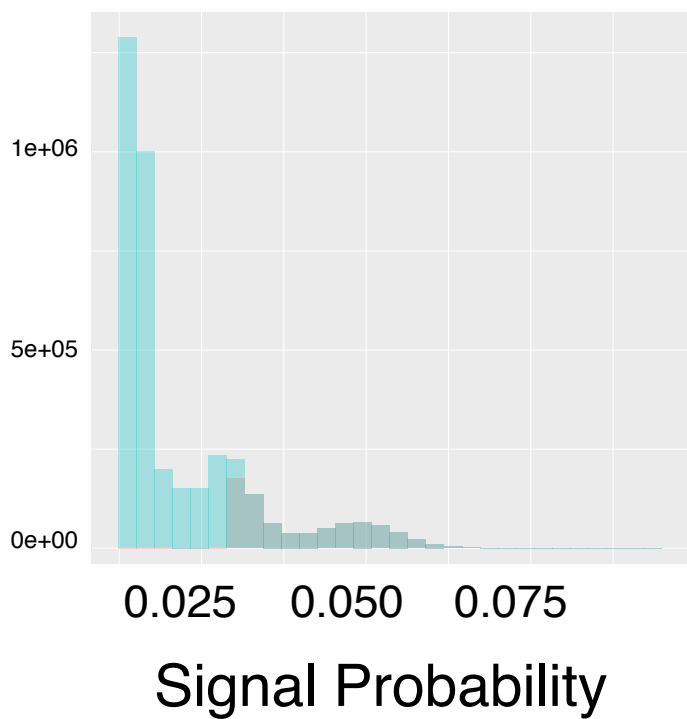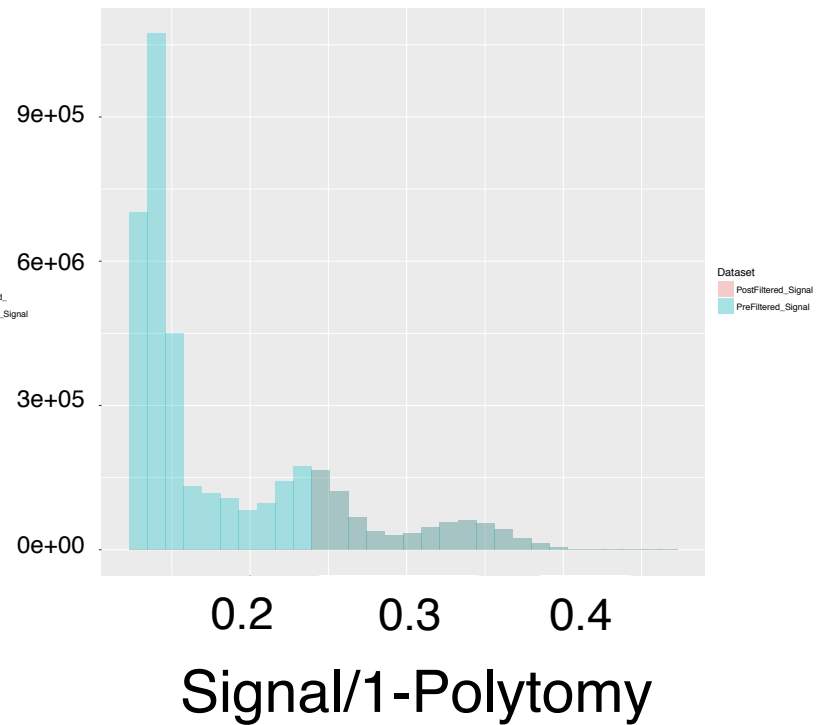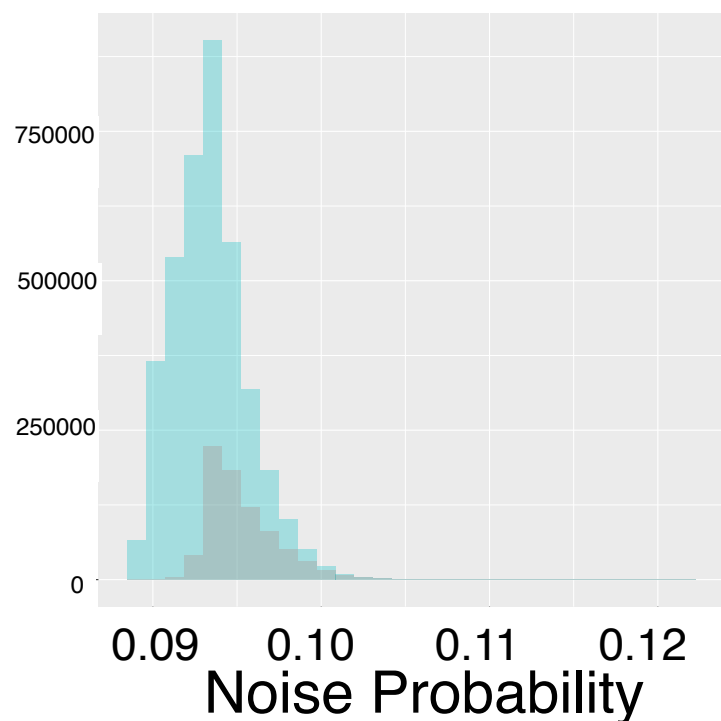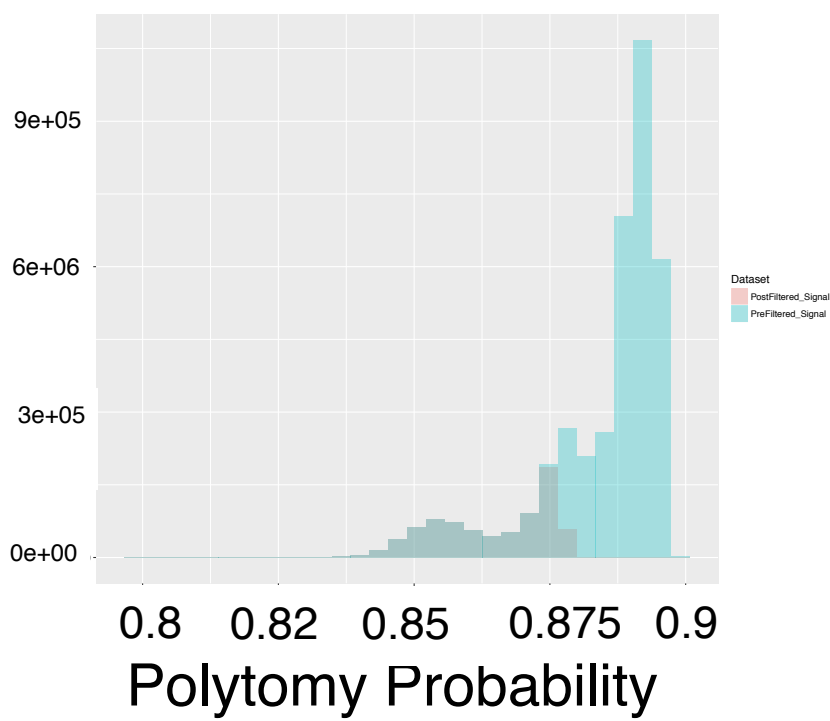

Supplement: NIHMS989322-supplement-Sup1.pdf [file NIHMS989322-supplement-Sup1.pdf]

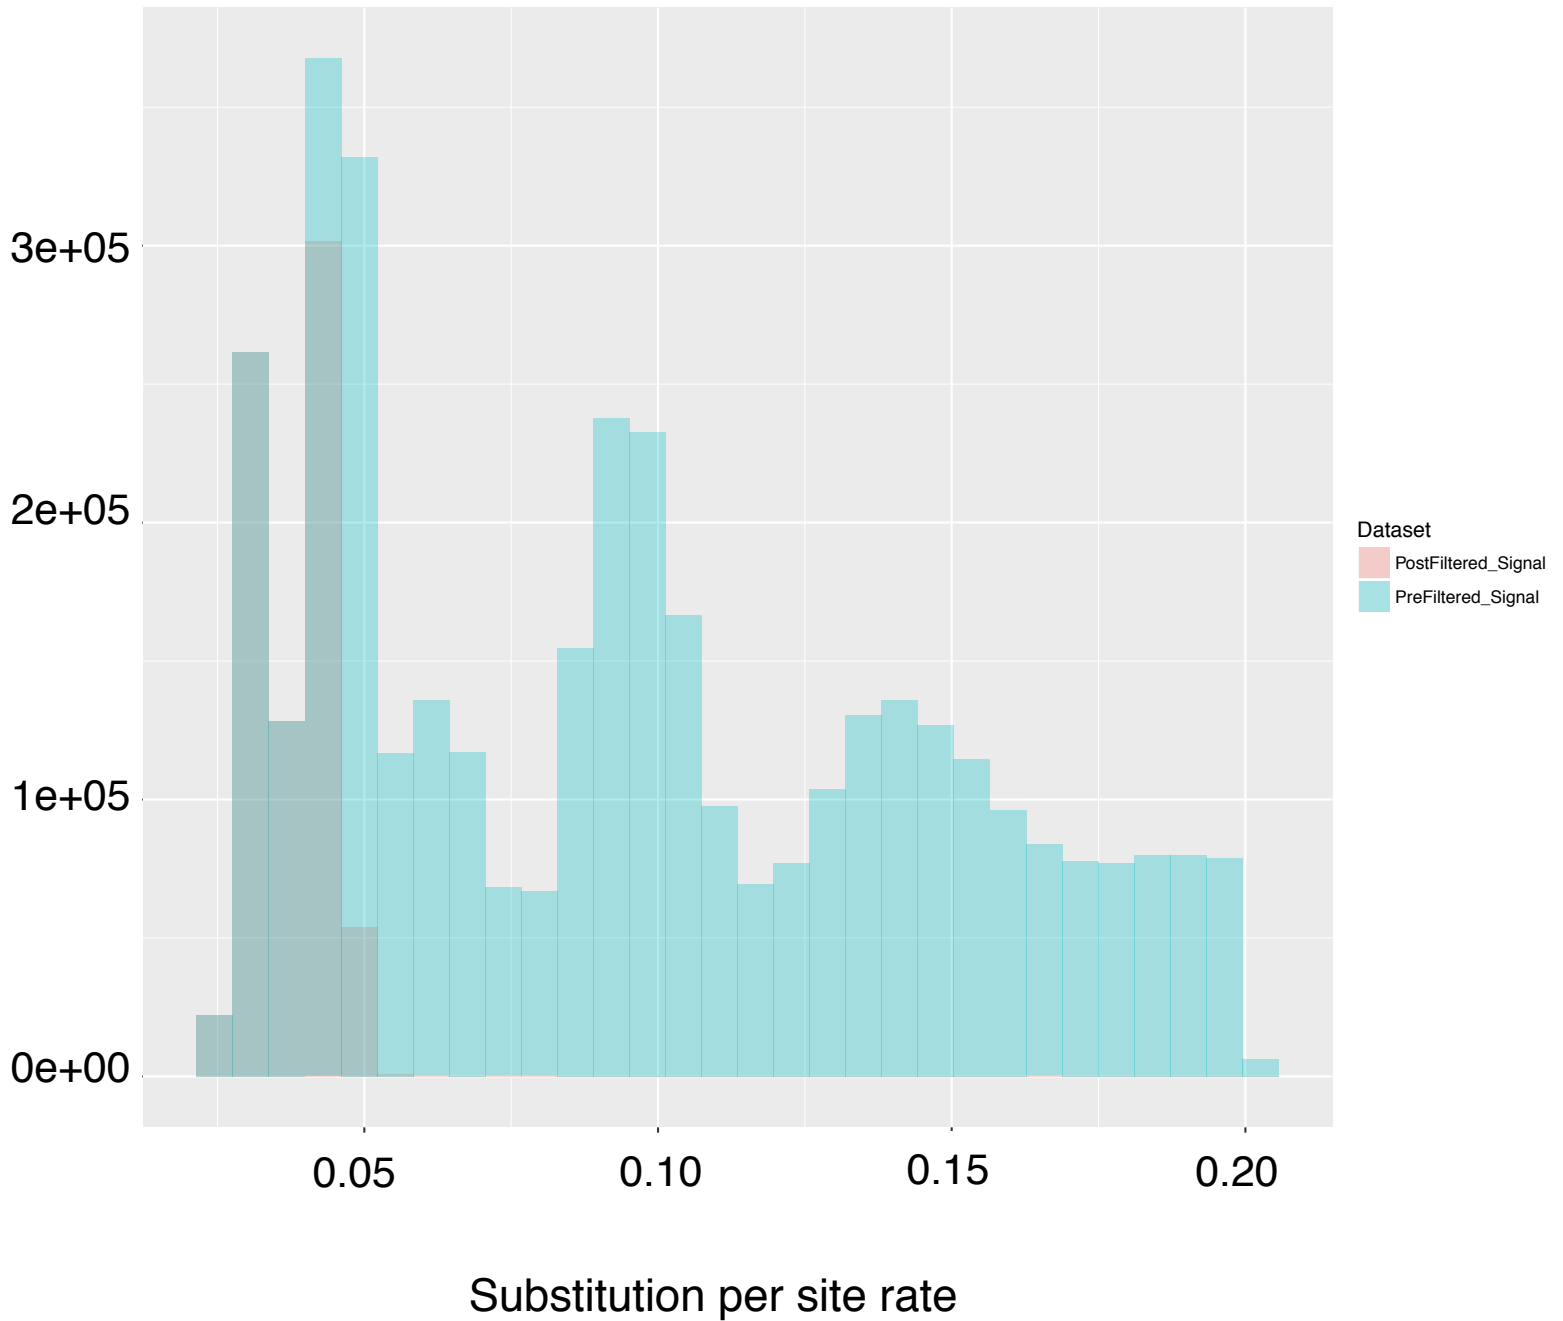

Supplement: NIHMS989322-supplement-Sup2.pdf [file NIHMS989322-supplement-Sup2.pdf]

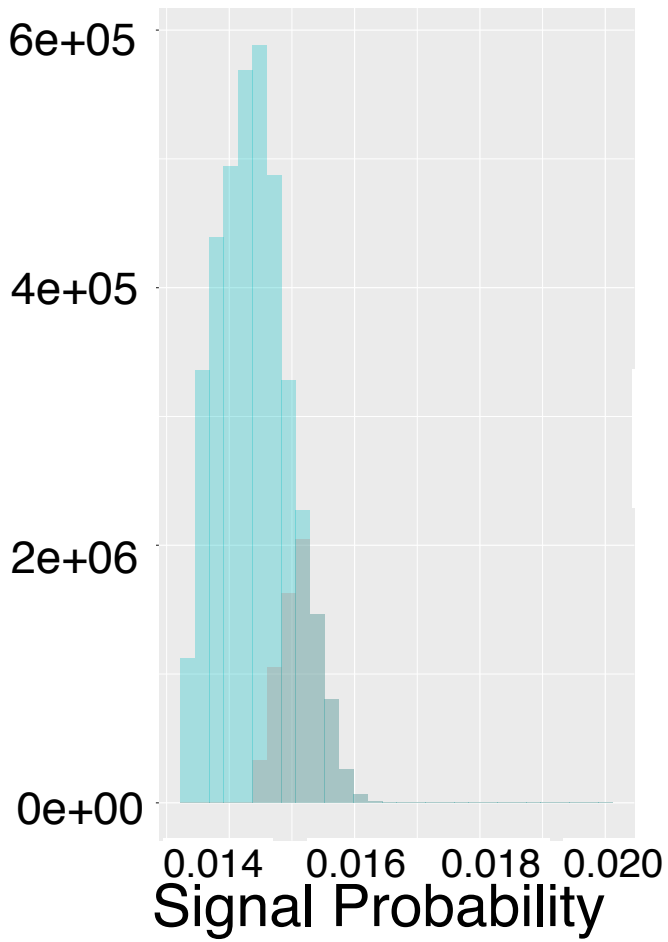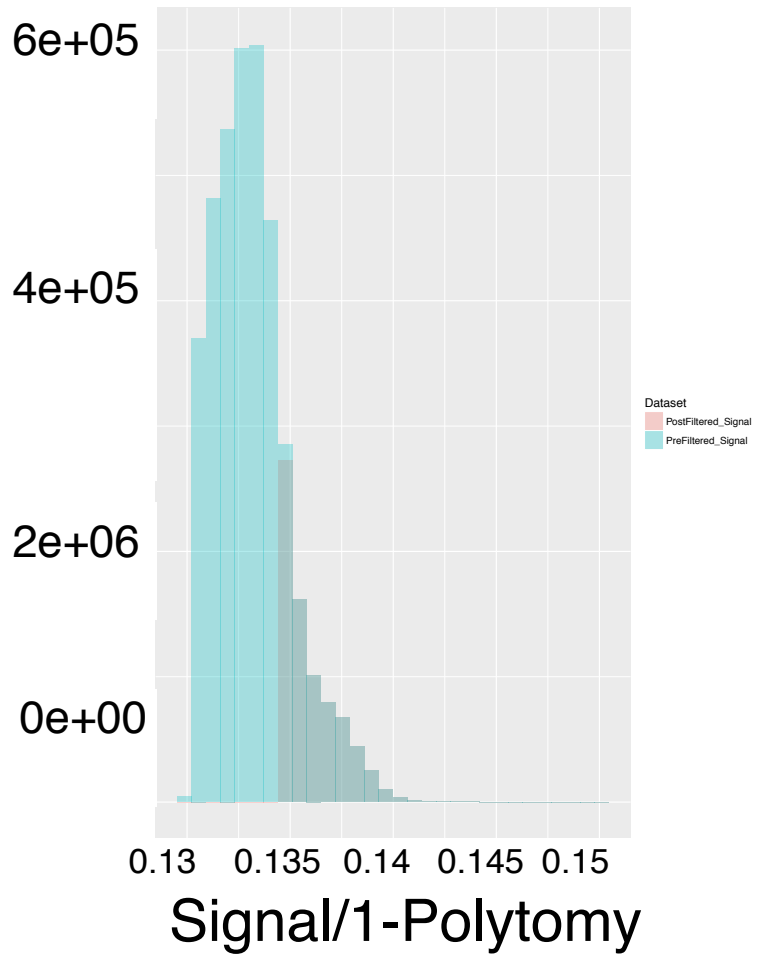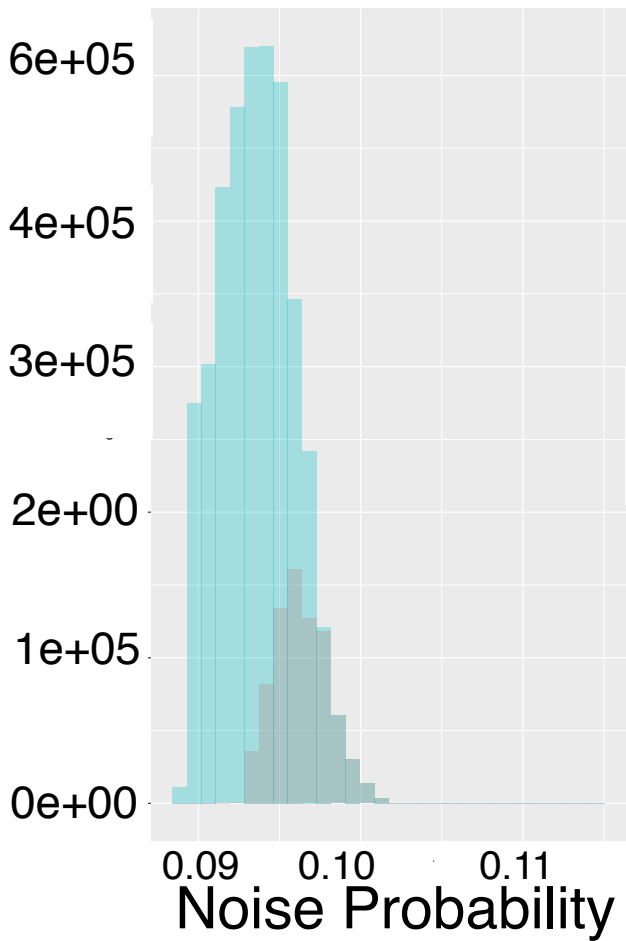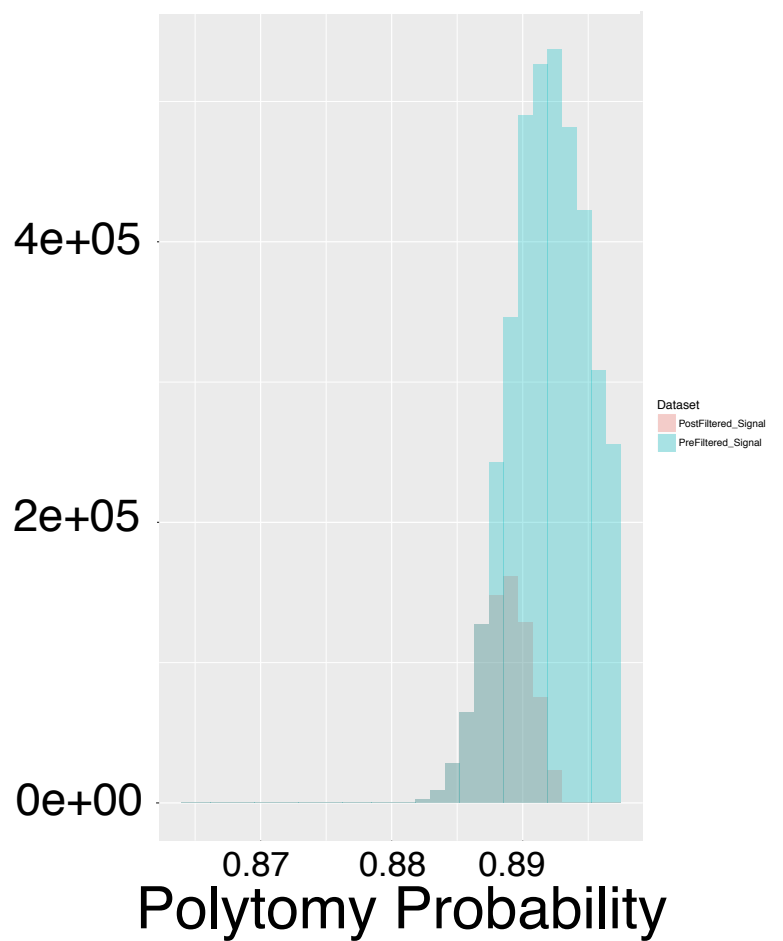

Supplement: NIHMS989322-supplement-Sup3.pdf [file NIHMS989322-supplement-Sup3.pdf]

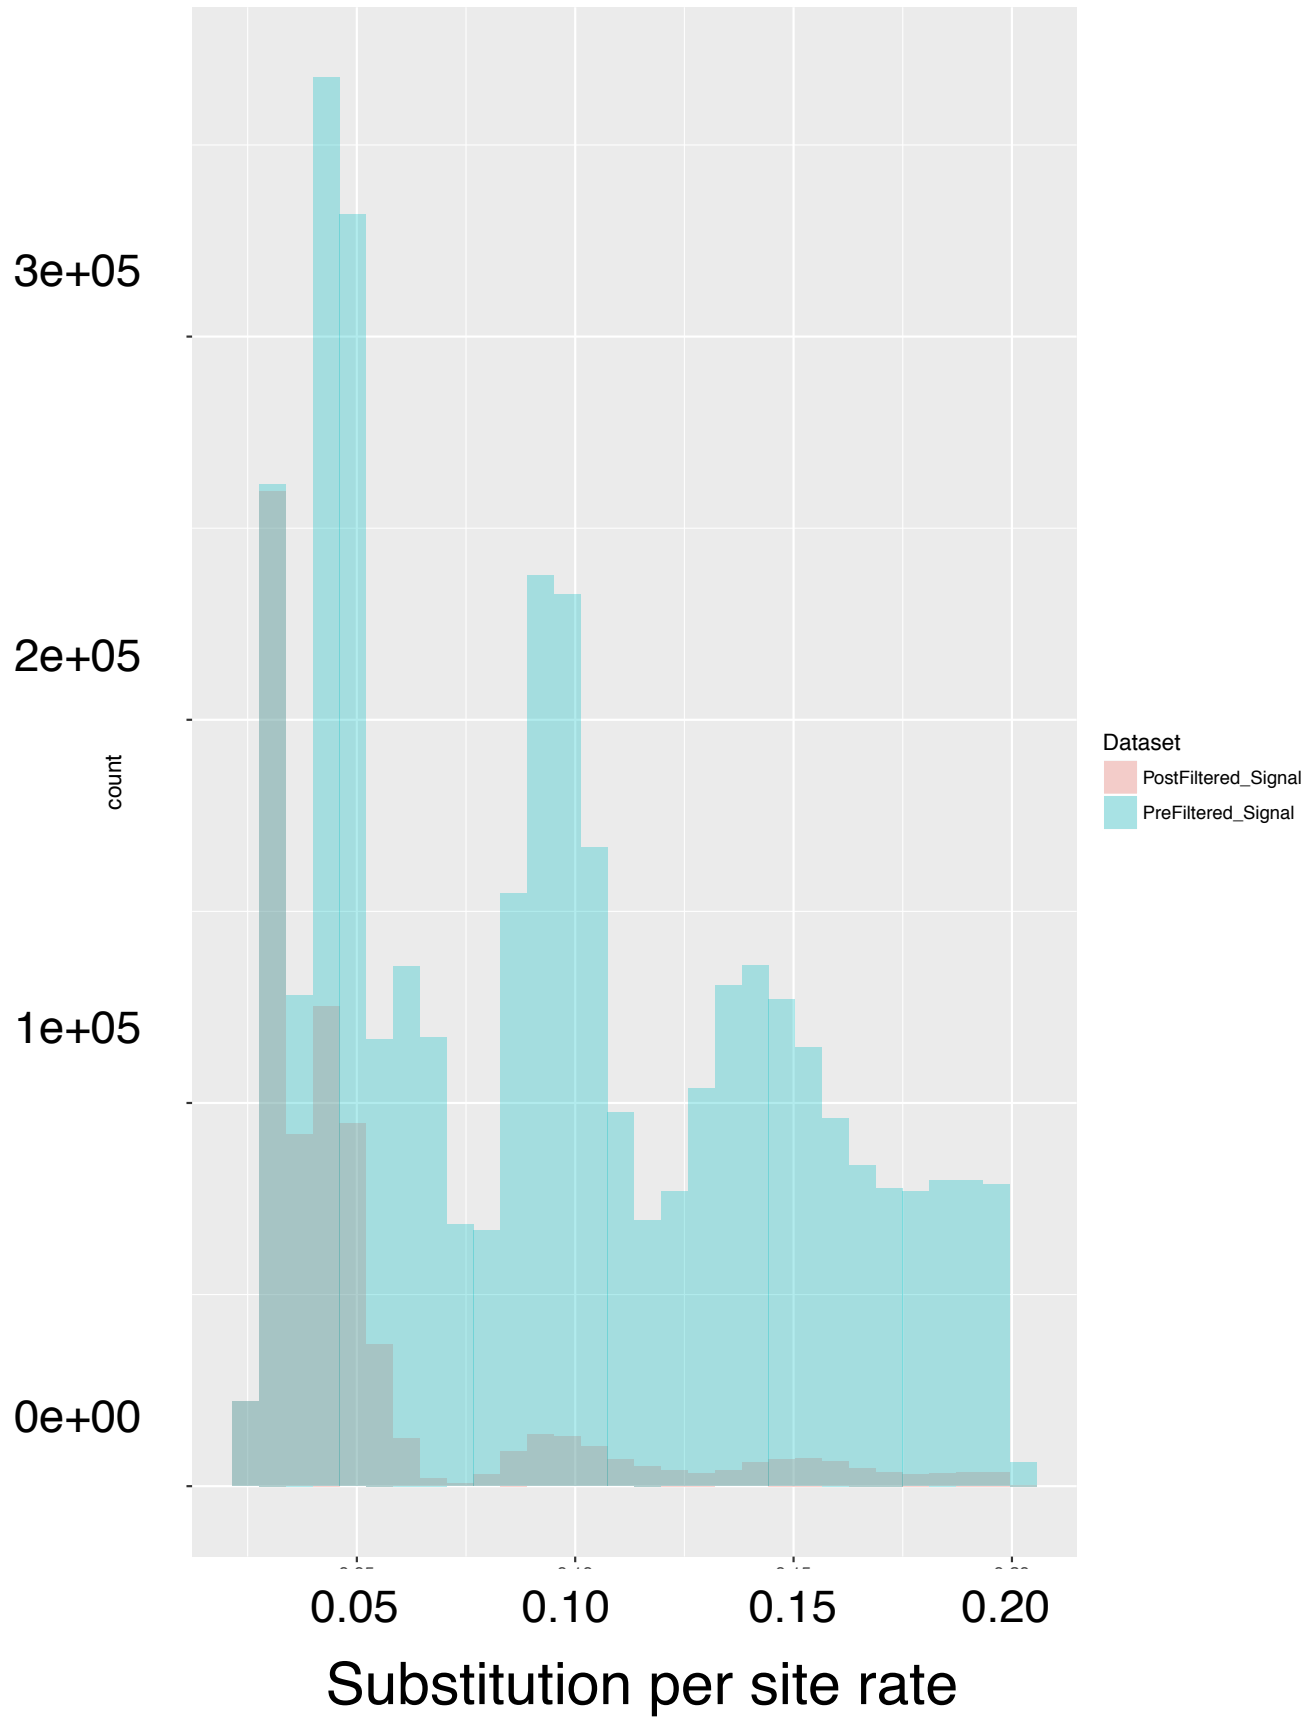

Supplement: NIHMS989322-supplement-Sup4.pdf [file NIHMS989322-supplement-Sup4.pdf]

# Unfiltered UCEs

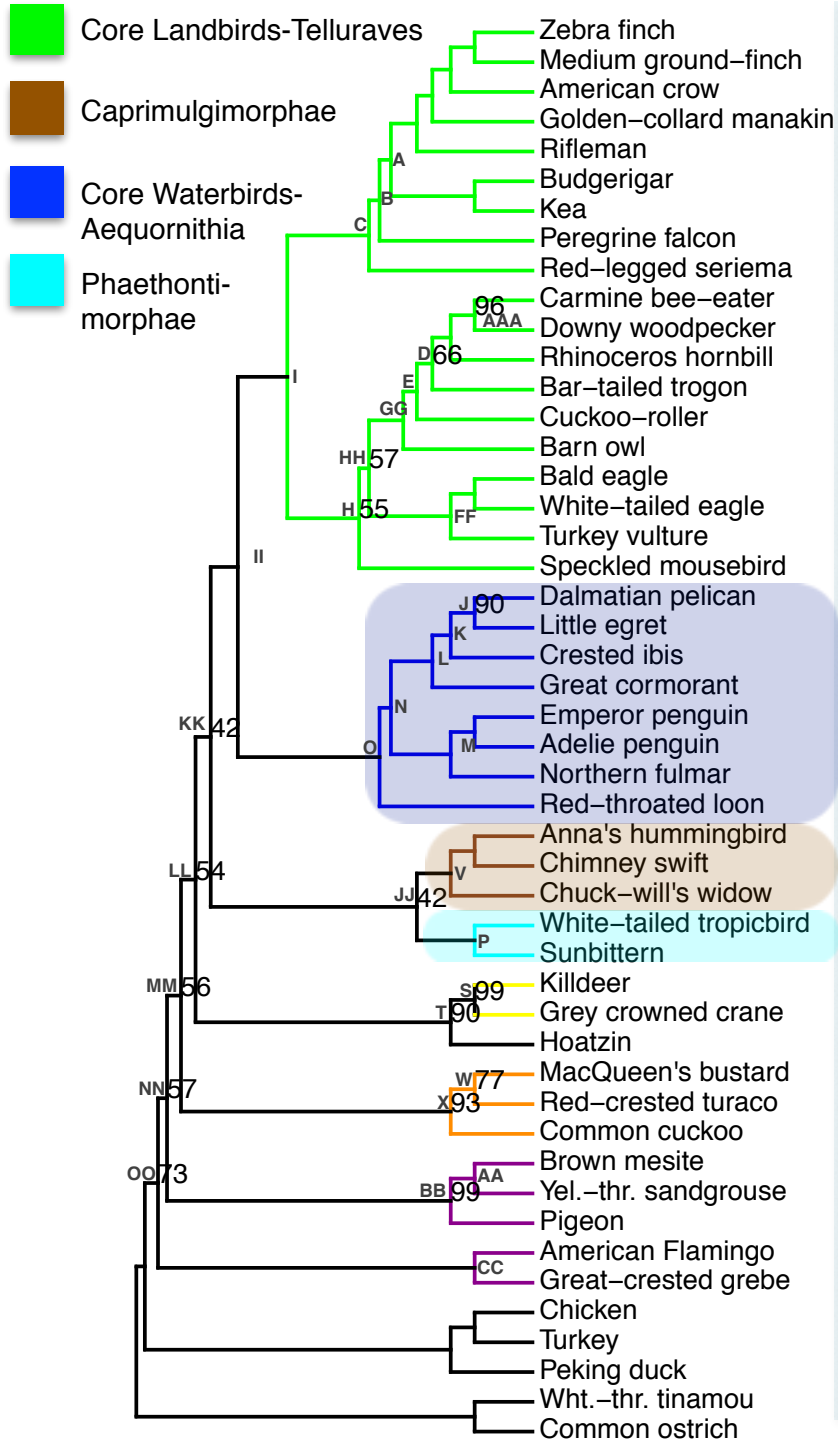

# Unfiltered UCEs (Jarvis et al. 2014)

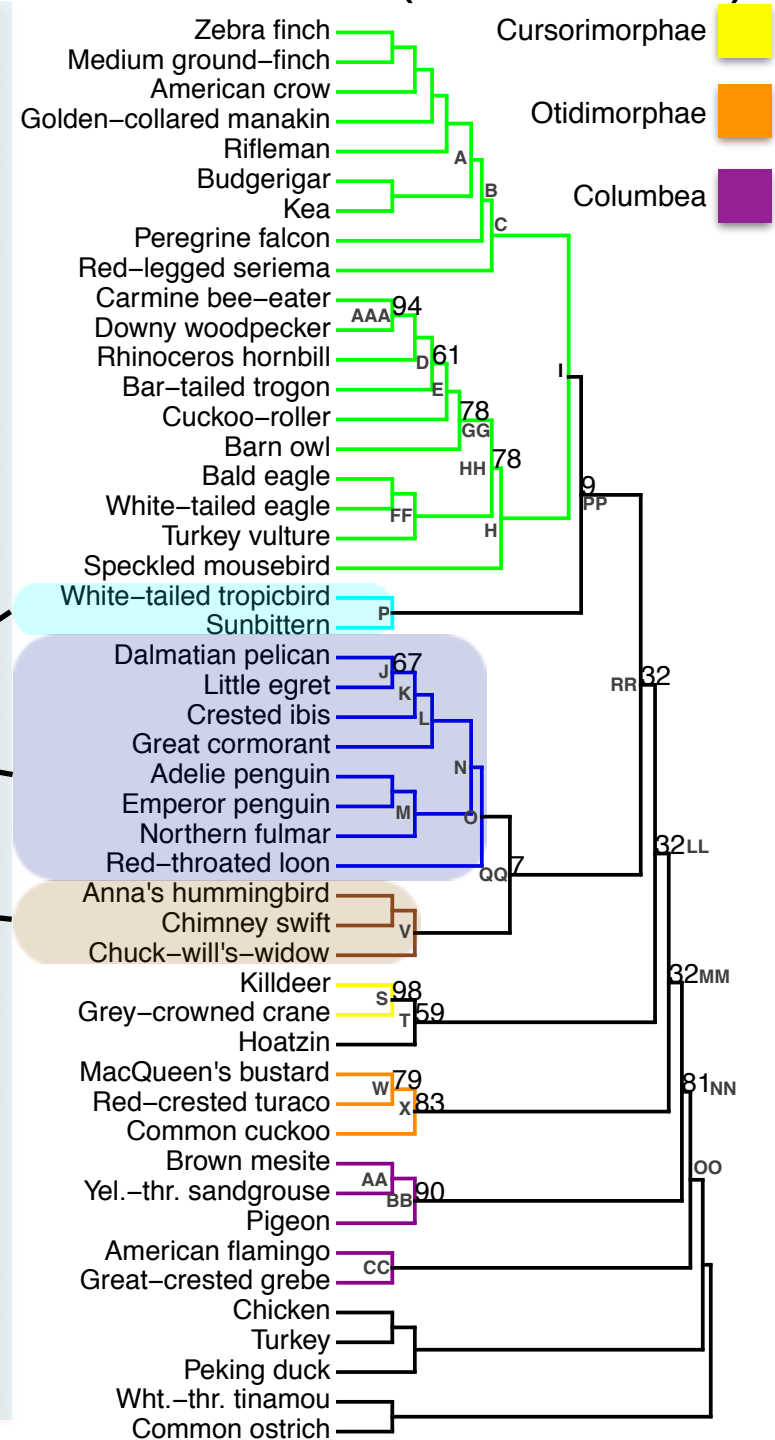

Supplement: NIHMS989322-supplement-Sup5.pdf [file NIHMS989322-supplement-Sup5.pdf]

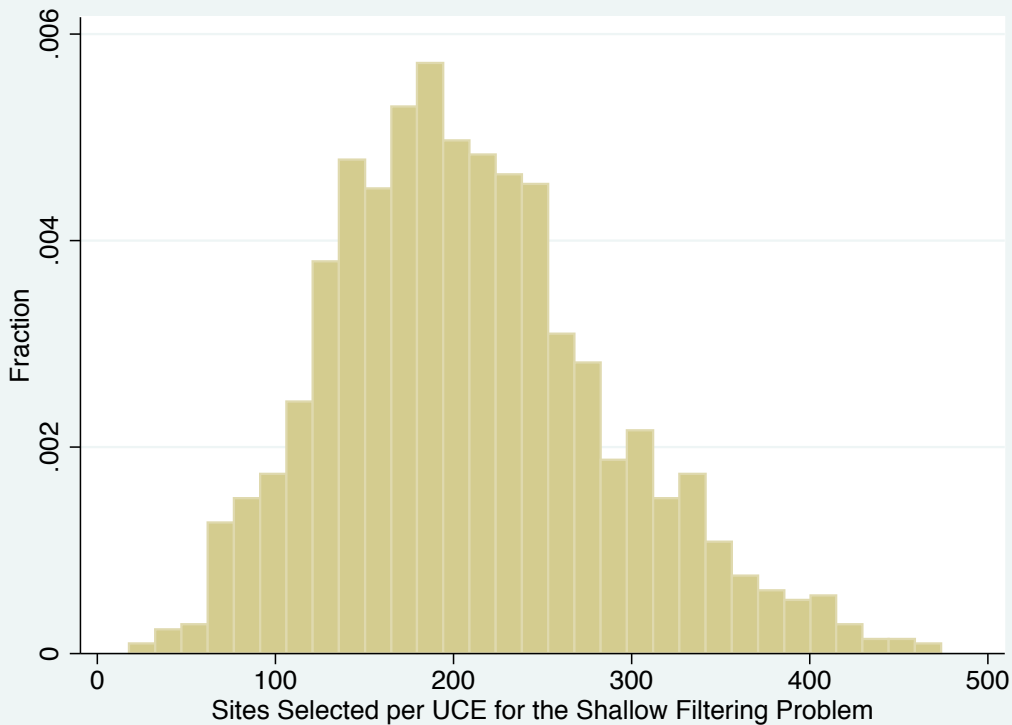

Supplement: NIHMS989322-supplement-Sup6.pdf [file NIHMS989322-supplement-Sup6.pdf]

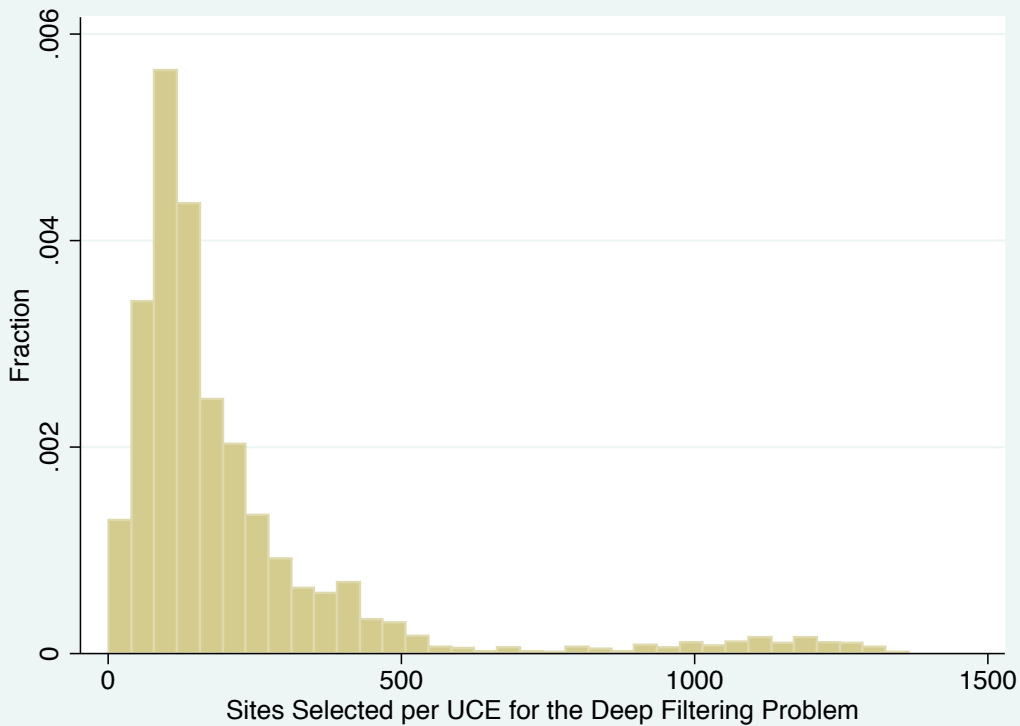

Supplement: NIHMS989322-supplement-Sup7.pdf [file NIHMS989322-supplement-Sup7.pdf]
